# Supplementary material for: Characterization of the iPSC-derived conditioned medium that promotes the growth of bovine corneal endothelial cells
Source: PeerJ. 2019 Apr 16;7:e6734. doi: 10.7717/peerj.6734 (PMC6474332; doi:10.7717/peerj.6734)
Supplement: Supplemental Information 2 [file peerj-07-6734-s002.xlsx]

## Sheet: Figure 1
	Figure 1 A. Viability of cells
	CEM	5%iPSCs-CM	25%iPSCs-CM	50%iPSCs-CM	5%iPSCs-M	25%iPSCs-M	50%iPSCs-M
	62.4	74.3	89.2	75.5	85.7	68.4	70.3
	63.2	73.8	92.7	76.2	64.5	65.2	61.6
	61.4	72.5	83.1	73.6	65	66.4	64.7
	62.7	74	86.1	80.4	61.8	63.6	62.5
	62.6	74.4	88.7	76.2	65.1	65.2	63.6
	62.8	71.8	86.3	76	61	62.7	62.8
	62.3	73.9		75.4	60.6	64.2	62.7
					63.5
	Figure 1B. Number of live cells
		CEM			25%iPSCs-CM
	1d	142	165	177	167	156	149
	3d	403	479	496	815	884	869
	5d	1753	1792	1706	3710	3798	3722

## Sheet: Figure 2
	Gene expression levels
	Gene	CEM			25%iPSCs-CM
	ATP1A1	21.92	22.53	24.49	47.3	46.65	50.35
	Col4A	9.61	7.23	11.11	14.56	18.69	19.61
	Col8A	9.6	10.96	12.49	19.75	22.49	18.08
	NIFK	4.27	5.08	6.08	12.85	8.78	12.24

## Sheet: Figure 3
	Group	Mean	SD
Annexin V+PI positive cells (%)	CEM	10.8733	0.460579
	25%iPSCs-CM	1.1	0.360555
S+G2 (%)	CEM	11.87	2.77
	25%iPSCs-CM	20.54	0.45

## Sheet: Figure 4
	Time	CEM			25%iPSCs-CM
	0h	100	97.6	101.5	99.6	97.7	102.3
	9h	76.5	83.7	80.1	57.5	60.3	63.3
	24h	30.1	27.7	31.5	7.8	9.6	8.4

## Sheet: Figure 5
	Figure 5A
	Time	CEM			25%iPSCs-CM
	3d	0.961	0.97	0.95	0.925	0.868	0.892
	5d	0.838	0.888	0.815	0.814	0.862	0.839
	7d	0.751	0.806	0.748	0.714	0.765	0.72
	Figure 5B
	Time	CEM			25%iPSCs-CM
	3d	0.973	0.983	0.959	0.873	0.881	0.876
	5d	0.936	0.953	0.965	0.817	0.835	0.848
	7d	0.942	0.953	0.933	0.715	0.724	0.757

## Sheet: Figure 6
	Figure 6B
	Time	CEM			25%iPSCs-CM
	30 min	1.103	1.106	1.233	0.868	0.877	0.852
	180min	0.726	0.722	0.707	0.416	0.42	0.407
	Figure 6C
	iPSCs-M	1001.31	1009.48	995.14
	iPSCs-CM	1585.49	1543.72	1567.38
